# Supplementary material
Source: Springer Nature journal article supplement (https://www.springermedizin.de/resource/supplementary/12916_2012_719_MOESM4_ESM.docx/9598222)

Figure 5

**
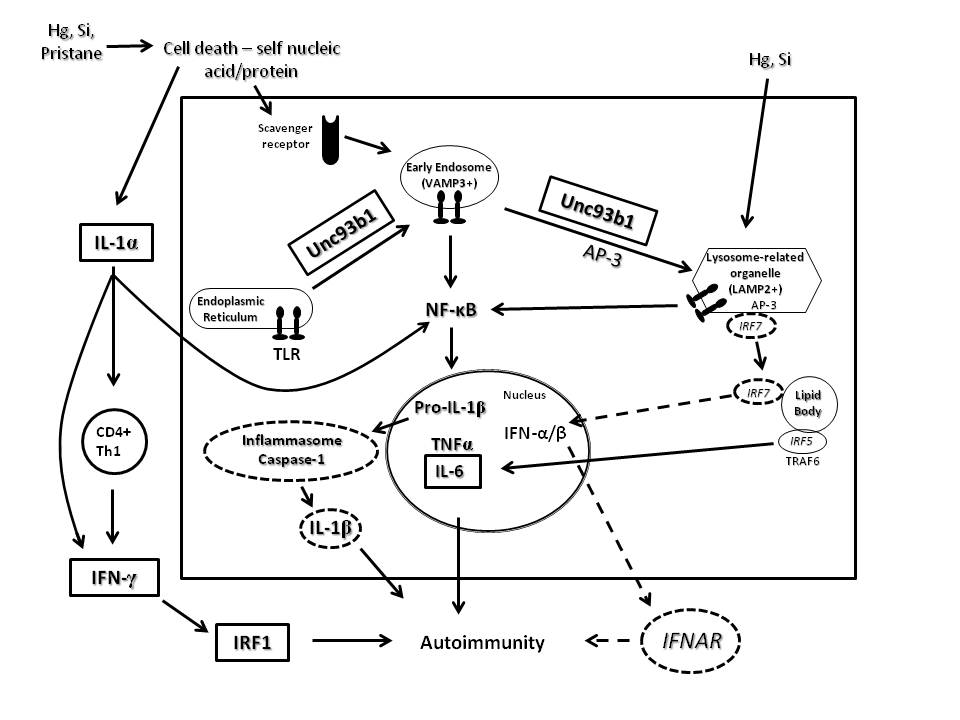
**

Supplement: MOESM4 [file 9598222]
